# Supplementary material for: A new bifunctional catalyst for tandem Heck–asymmetric dihydroxylation of olefinsElectronic supplementary information (ESI) available: TEM image of 3, experimental procedures, characterization data of products and heterogeneity tests. See http://www.rsc.org/suppdata/cc/b1/b110681n/
Source: Royal Society of Chemistry journal article supplement (doi:10.1039/b110681n), 2002-02-18
Supplement: b110681n.doc [file b110681n.doc]

# Supplementary data

**A New Bifunctional Catalyst for Tandem Heck-Asymmetric Dihydroxylation of Olefins**

**Boyapati M. Choudary,* Naidu S. Chowdari, Karangula Jyothi, Nadakuditi S. Kumar and Mannepalli L. Kantam,**

Indian Institute of Chemical Technology, Hyderabad 500 007, India.

### Supplementary Information

**General:** IR spectra were recorded on BIORAD 175C FTIR spectrometer for samples as KBr pellets. Diffuse reflectance UV spectra were recorded on GBC cintra 10 e UV-VIS spectrometer for samples as KBr pellets. 1H and 13C NMR spectra were recorded on a Varian Gemini 200 MHz spectrometer. Chemical shifts () are reported in ppm, using TMS for 1H NMR and CDCl3 for 13C NMR as internal standards. Specific surface areas are calculated from BET nitrogen isotherms determined at –196 oC (Micromeritics ASAP 2000) on samples degassed at 250 oC for 12 h before the experiment. Transmission Electron Microscopy (TEM) was performed on JEOL JEM 100 CX instrument using formovar coated copper grids. High Performance Liquid Chromatography (HPLC) was performed using the following apparatus; SHIMADZU LC–10AT (liquid Chromatograph) SHIMADZU SPD–10A (UV detector), and SHIMADZU C-R6A Chromatopac. ACME silica gel (100-200 mesh) was used for column chromatography and thin layer chromatography was performed on Merck precoated silica gel 60–F254 plates. Optical rotations were obtained on a Jasco P-1020 Polarimeter and reported as follows [temperaturewavelength, concentration (c = g/100 mL), and solvent.

OsO4, dihydroquinidine, quinidine, 1,4-dichlorophthalazine, NMO, methane suolfonamide, aryl halides and olefins were purchased from Aldrich. All other solvents and chemicals were obtained from commercial sources, and were used without further purification.

**Preparation of bifunctional catalyst (3**·OsO4**)**:Silica gel (200 mesh) (4 g) was treated with 18 ml of 3-mercaptopropyl trimethoxysilane in 22 ml of anhydrous 1:1 pyridine/toluene. The slurry was heated at 90 C for 24 h. After filtration, the solid was washed with toluene followed by Soxhlet extraction with toluene and dried under vacuum for 1 h to give 3-mercaptopropyl silica gel **2** containing 3.38% S, corresponding to 1.05 mmol of S per gram. This derivatised silica gel **2** (2 g) was suspended in chloroform and refluxed with 4-(9-*O*-dihydroquinidinyl)-1-(9-*O*-quinidinyl)phthalazine **1** (0.781 g, 1 mmol) and AIBN (55 mg) as radical initiator for 48 h. The resulting solid was filtered followed by washing with methanol, Soxhlet extraction with toluene and drying under vacuum for 1 h to give SGS-(DHQD)2PHAL(1.66 wt.% of N, corresponding to 0.197 mmol of alkaloid per gram). 2 g of SGS-(DHQD)2PHAL was treated with PdCl2 (0.071 g, 0.4 mmol) in acetone (10 mL) under reflux for 24 h. The dark yellow powder was filtered, washed with acetone, then stirred with hydrazine hydrate (1.5 mL) and ethanol (10 mL) at room temperature for 4 h. The resulting green solid was filtered, washed with ethanol and dried under vacuum for 1 h to give a light green colored solid **3** (~0.2 mmol of each alkaloid and palladium per gram).

**Asymmetric dihydroxylation of olefins using bifunctional catalyst**:

***Using NMO as the cooxidant****:* Catalyst**3** (50 mg, 0.01 mmol) and OsO4 (0.01 mmol) in acetonitrile (5 ml) were stirred for 10 min and aryliodide (1 mmol), olefin (1 mmol) and Et3N (1.1 mmol) were added and stirred at 70C for 8 h (16 h for entry 2). At this stage, the heating was stopped and solvent was removed under vacuum. NMO (1.3 mmol) in *t*BuOH-H2O (3:1, 5 mL) was added and stirred at room temperature for 12 h. After completion of the reaction, the catalyst was filtered and washed with ethyl acetate. After removing the solvent, the crude material was chromatographed on silica gel to afford the corresponding *cis*-diol.

***Using K3Fe(CN)6 as the cooxidant****:* Catalyst**3** (50 mg, 0.01 mmol) and OsO4 (0.01 mmol) in acetonitrile (5 ml) were stirred for 10 min and aryliodide (1 mmol), olefin (1 mmol) and K2CO3 (4 mmol) were added and stirred at 70C for 8 h (16 h for entry 2). At this stage, the heating was stopped and solvent was removed under vacuum. K3(FeCN)6 (3 mmol) in *t*BuOH-H2O (1:1, 10 mL) was added and stirred at room temperature for 12-24 h. After completion of the reaction, the catalyst was filtered and washed with ethyl acetate. After removing the solvent, the crude material was chromatographed on silica gel to afford the corresponding *cis*-diol.

**Characterization of Products:**

The specific rotation values for the diols obtained with K3(FeCN)6 cooxidant were presented below. The enantiomeric excess of the diols was determined by HPLC analysis using chiral stationary phases.

**Methyl 2,3-dihydroxy-3-pheylpropionate.** []25D –10.60 (c 1.0 CHCl3) [Lit.1 -10.7 (c 1.0, CHCl3)]; 1H NMR ** 3.32 (brs, 2H), 3.81 (s, 3H), 4.36 (d, *J* = 2.8 Hz, 1H) 5.01 (d, *J* = 2.8 Hz,1H), 7.36 (m, 5H); 13C NMR  52.8, 74.4, 74.7, 126.2, 128.1, 128.4, 139.9, 173.1; HPLC (Daicel Chiralcel OJ, 10%  iPrOH in hexane, flow rate 1.0 mL/min): *t*R = 19.1 (minor), *t*R = 26.7 (major).

**Ethyl 2,3-dihydroxy-3-(4-methoxyphenyl)propionate.** []25D –5.94 (c 1.0, CHCl3); [Lit.2  -6.0 (c 0.84, CHCl3 )]; 1H NMR ** 1.29 (t, *J* = 7.3 Hz, 3H), 2.75 (brs, 2H), 3.80 (s, 3H), 4.23 (q, *J* = 7.3 Hz, 2H), 4.34 (dd, *J* = 3.3, 6.6 Hz, 1H), 4.89 (dd, *J* = 3.3, 6.6 Hz, 1H), 6.90 (d, *J* = 8.6 Hz, 2H), 7.36 (d, *J* = 8.6 Hz, 2H); HPLC (Daicel Chiralcel OJ, 10%  iPrOH in hexane, flow rate 1.0 mL/min): *t*R = 23.2 (minor), *t*R = 26.0 (major).

**Ethyl 2,3-dihydroxy-3-(4-nitrophenyl)propionate.** []25D –10.87 (c 0.2, CHCl3); [Lit.3  -11.1 (c 0.23, CHCl3 )]; 1H NMR ** 1.30 (t, *J* = 7.3 Hz, 3H), 2.9 (brs, 2H), 4.32 (q, *J* = 7.3 Hz, 2H), 4.40 (dd, *J* = 3.3, 6.6 Hz, 1H), 5.09 (dd, *J* = 3.3, 6.6 Hz, 1H), 7.65 (d, *J* = 8.4 Hz, 2H), 8.26 (d, *J* = 8.4 Hz, 2H);

**1,2-Diphenyl-1,2-ethanediol.** []25D 91.2 (c 1.0, EtOH) [Lit.4 91.0 (c 1.1, EtOH)]; 1H NMR ** 2.73 (brs, 2H), 4.69 (s, 2H), 7.09-7.22 (m, 10H); 13C NMR  79.1, 126.9, 127.9, 128.1, 139.8; HPLC (Daicel Chiralcel OJ, 10% iPrOH in hexane, flow rate 1.0 mL/min): *t*R= 12.1 (minor), *t*R = 13.3 (major).

**Heterogeneity tests:**

In order to understand the heterogeneity of the catalyst, we studied the reactions with bifunctional catalyst and the results indicate that the palladium was bound to the support throughout the reaction, while osmium is partially leached from the support into solution. The leaching of osmium is due to the dissociation of coordinate bond between osmium and the nitrogen base in the hydrolytic release of diol from glycolate ester intermediate.

Experiment (1): Catalyst **3** (1 mol%), iodobenzene (1mmol), styrene (1mmol) and Et3N (1.1 mmol) in acetonitrile (2 mL) were stirred at 70 C for 2 h and the yield of the Heck product is 32%. At this stage the catalyst was filtered and two separate experiments were carried out with the solid catalyst (on addition of fresh reactants) as well as with the filtrate as such. After 6h, the reaction was completed in the experiment conducted with catalyst. On the other hand there was no change in the yield of product observed in the experiment conducted with the filtrate.

Experiment (2): Similar Heck reaction with identical amounts of ingredients was conducted until completion (6 h) and filtered. Two sets of fresh reactions were carried out with the filtrate and the catalyst. The filtrate of the reaction did not show any activity, whereas the recovered catalyst showed identical activity as observed in first cycle. These results suggest that the Pd is bound to the support during the reaction.

Experiment (3): The heterogeneity of bifunctional catalyst, **3**·OsO4 was also tested in the dihdroxylation reaction. The synthesis of 1,2-diphenyl-1,2-ethanediol was carried out as a test reaction using 1 mol% of osmium alkaloid complex. The recovered catalyst was tested in the second run and shows 70% of initial activity. The loss of activity is attributed to the loss of osmium in to the solution in the 1st run. These results are in agreement with the earlier observation using polymer/silica anchored alkaloids.

Experiment (4): For methyl cinnamate diol we have obtained 90% ee with our heterogeneous catalyst using NMO oxidant against 87% ee with homogeneous AD process. The higher ee may be ascribed to the Et3NHI salt, which is formed in the Heck reaction is capable of hydrolyzing the osmium monoglycolate complex and prevents the second cycle to some extent (like tetraethylammonium acetate additive is known for faster rates and higher ee.5 We conducted a separate experiment to know the effect of Et3NHI and heterogeneous catalyst on ee. We obtained 90% ee, when an experiment was conducted with catalyst, Et3NHI, methyl cinnamate using NMO oxidant. Without Et3NHI additive 88% ee was obtained, which is close to the 87% ee obtained under homogeneous catalysis.

**REFERENCES:**

1. J. -N. Denis, A. Correa, A. E. Greene, *J. Org. Chem.,* 1990,**55***,* 1957.
2. F. Matsuura, Y. Hamada, T. Shioiri, *Tetrahedron* 1994,**50***,* 9457.
3. M. G. B. Drew, M. Fengler-Veith, L. M. Harwood, A. W. Jahans, *Tetrahedron* *Lett*., 1997, **38**, 4521.
4. G. Berti, F. Bottari, *J. Org. Chem.,* 1960, **25***,* 128*6.*
5. J. S. M. Wai, I. E. Marko, J. S. Svendsen, M. G. Finn, E. N. Jacobsen, K. B. Sharpless, *J. Am. Chem. Soc.* 1989, **111**, 1123.
