# Supplementary material for: A new bifunctional catalyst for tandem Heck–asymmetric dihydroxylation of olefinsElectronic supplementary information (ESI) available: TEM image of 3, experimental procedures, characterization data of products and heterogeneity tests. See http://www.rsc.org/suppdata/cc/b1/b110681n/
Source: Royal Society of Chemistry journal article supplement (doi:10.1039/b110681n), 2002-02-18
Supplement: b110681n2.doc [file b110681n2.doc]

# Supplementary data

**A New Bifunctional Catalyst for Tandem Heck-Asymmetric Dihydroxylation of Olefins**

**Boyapati M. Choudary,* Naidu S. Chowdari, Karangula Jyothi, Nadakuditi S. Kumar and Mannepalli L. Kantam,**


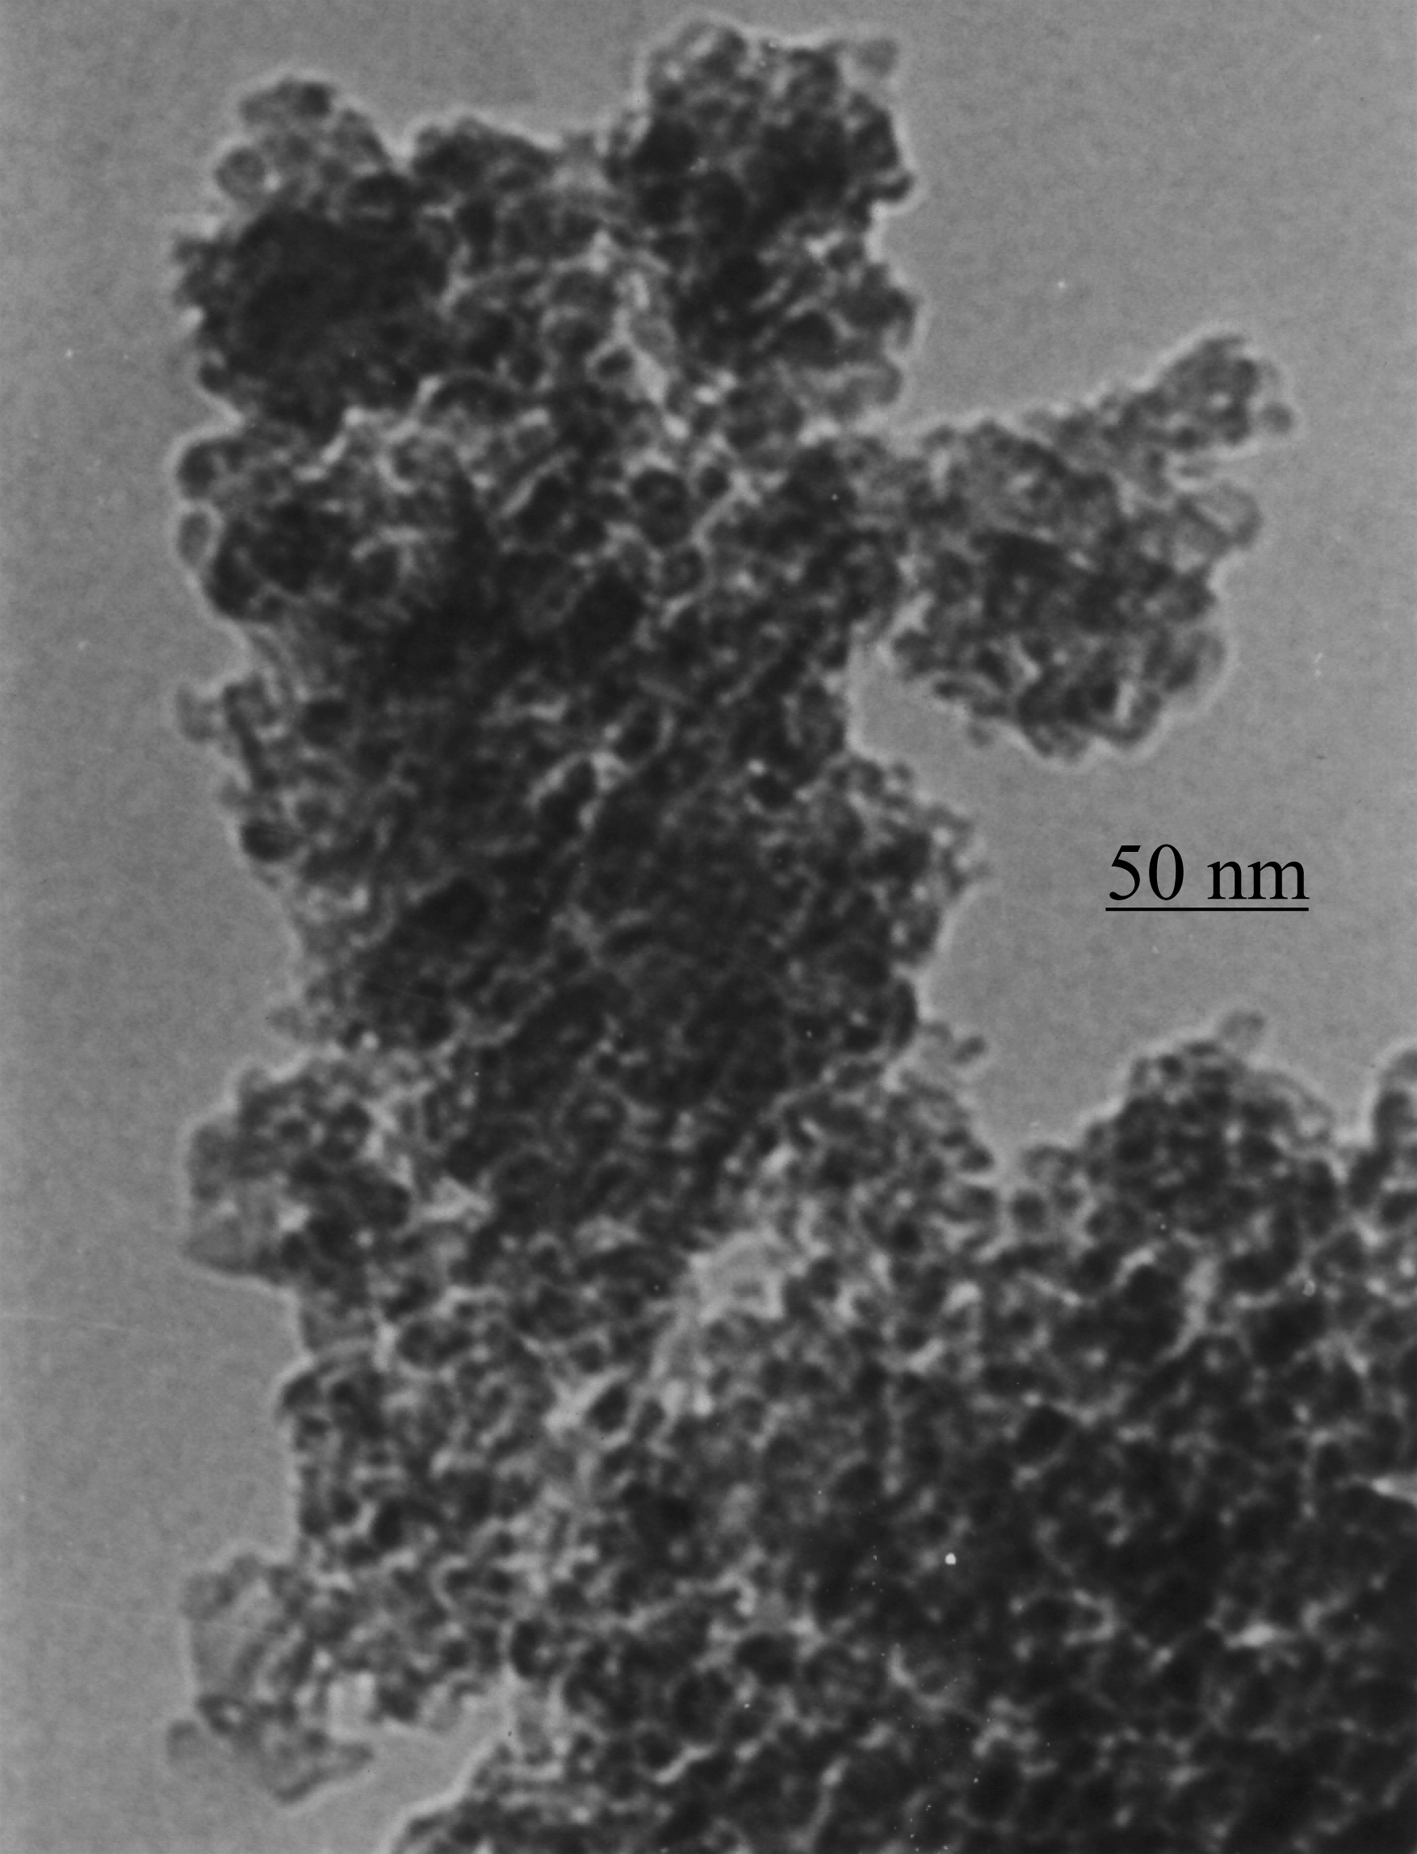


The BET surface areas of silica gel, mercaptopropyl silica gel **2**, SGS-(DHQD)2PHAL and SGS-(DHQD)2PHAL(Pd) **3** are found to be 249, 210, 152 and 123 m2g-1 respectively. The reduction in the surface area after anchoring the spacer and ligand is due to the presence of organic moieties on the silica gel surface.
